# Supplementary material for: Predicting gait adaptations due to ankle plantarflexor muscle weakness and contracture using physics-based musculoskeletal simulations
Source: PubMed Central journal article supplement (PMC6797212; doi:10.1371/journal.pcbi.1006993), 2019-10-07
Supplement: pcbi.1006993.s002.pdf [file pcbi.1006993.s002.pdf]

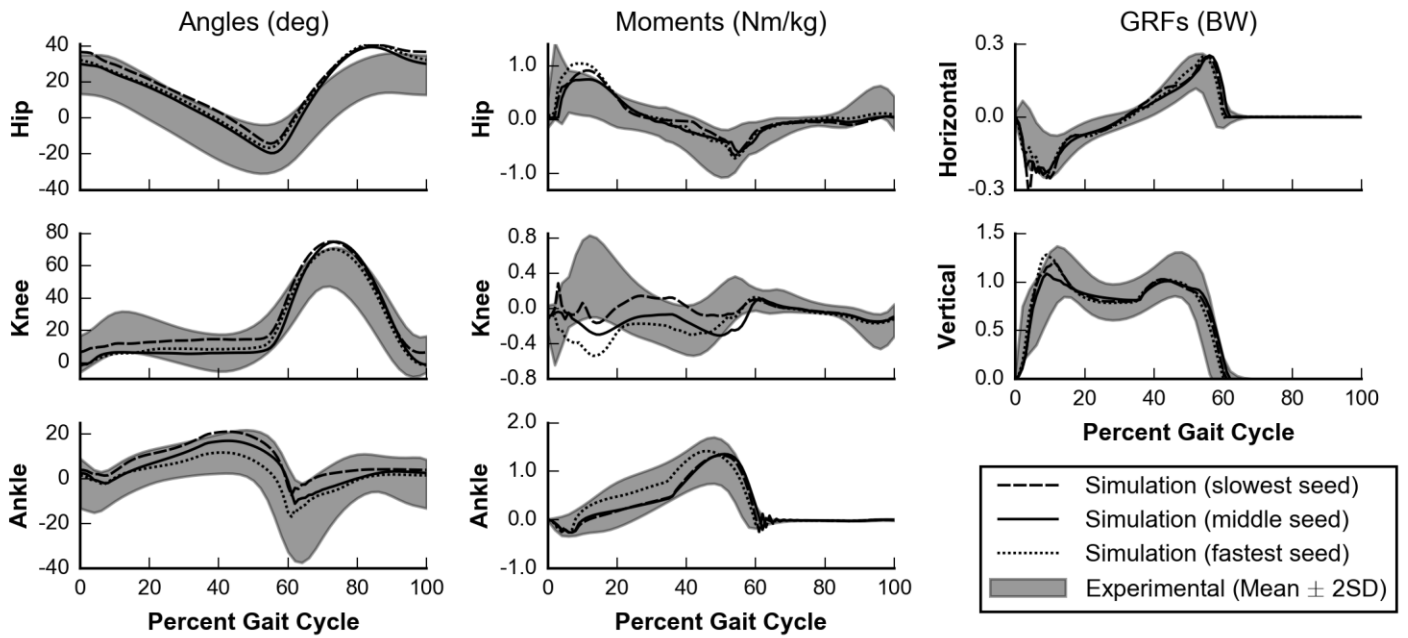

**S2 Fig. Kinematic and kinetic trajectories for all three self-selected gait seeds (black lines) against experimental data (gray area).**
