# Supplementary material for: Predicting gait adaptations due to ankle plantarflexor muscle weakness and contracture using physics-based musculoskeletal simulations
Source: PubMed Central journal article supplement (PMC6797212; doi:10.1371/journal.pcbi.1006993), 2019-10-07
Supplement: pcbi.1006993.s005.pdf [file pcbi.1006993.s005.pdf]

**S1 Table. Muscle parameters for the unimpaired musculoskeletal model.**

| <b>Muscle name</b> | <b>Maximum isometric force (<math>F_0^m</math>)* [N]</b> | <b>Optimal fiber length (<math>l_0^m</math>) [m]</b> | <b>Muscle passive parameters (<math>k^{PE}, \varepsilon_0^m</math>)**</b> | <b>Maximum fiber contraction velocity [<math>l_0^m/s</math>]</b> | <b>Tendon slack length [m]</b> | <b>Tendon strain at <math>F_0^m</math></b> | <b>Muscle path from <i>Delp et al. 1990</i> model</b> |
|--------------------|----------------------------------------------------------|------------------------------------------------------|---------------------------------------------------------------------------|------------------------------------------------------------------|--------------------------------|--------------------------------------------|-------------------------------------------------------|
| <b>ILPSO</b>       | 2697                                                     | 0.117                                                | (5, 0.6)                                                                  | 15                                                               | 0.130                          | 0.049                                      | psoas                                                 |
| <b>GMAX</b>        | 3338                                                     | 0.157                                                | (5, 0.6)                                                                  | 15                                                               | 0.048                          | 0.049                                      | gluteus maximus2                                      |
| <b>RF</b>          | 2192                                                     | 0.076                                                | (9, 1.0)                                                                  | 15                                                               | 0.346                          | 0.049                                      | rectus femoris                                        |
| <b>HAMS</b>        | 4105                                                     | 0.069                                                | (5, 0.8)                                                                  | 15                                                               | 0.349                          | 0.049                                      | semimembranosus                                       |
| <b>VAS</b>         | 9594                                                     | 0.099                                                | (9, 1.0)                                                                  | 15                                                               | 0.102                          | 0.049                                      | vastus intermedius                                    |
| <b>BFSH</b>        | 557                                                      | 0.11                                                 | (5, 0.6)                                                                  | 15                                                               | 0.117                          | 0.049                                      | biceps femoris short head                             |
| <b>GAS</b>         | 4691                                                     | 0.051                                                | (5, 0.6)                                                                  | 15                                                               | 0.384                          | 0.1                                        | medial gastrocnemius                                  |
| <b>TA</b>          | 2117                                                     | 0.068                                                | (5, 0.6)                                                                  | 15                                                               | 0.238                          | 0.049                                      | tibialis anterior                                     |
| <b>SOL</b>         | 7925                                                     | 0.044                                                | (5, 0.6)                                                                  | 15                                                               | 0.244                          | 0.1                                        | soleus                                                |

\* Maximum isometric force is based on a specific tension of 60 N/cm<sup>2</sup>.

\*\*  $k^{PE}$  is the exponential shape factor for the passive force-length curve.  $\varepsilon_0^m$  is the passive muscle strain at  $F_0^m$ . The symbols match those from *Thelen 2003*.
