# Supplementary material for: Predicting gait adaptations due to ankle plantarflexor muscle weakness and contracture using physics-based musculoskeletal simulations
Source: PubMed Central journal article supplement (PMC6797212; doi:10.1371/journal.pcbi.1006993), 2019-10-07
Supplement: pcbi.1006993.s006.pdf [file pcbi.1006993.s006.pdf]

**S2 Table. Initial Covariance Matrix Adaptation Evolutionary Strategy (CMA-ES) standard deviation for each free parameter.**

| <b>Parameter</b>                                           | <b>Parameter description*</b>                                                                                 | <b>Initial CMA standard deviation</b> |
|------------------------------------------------------------|---------------------------------------------------------------------------------------------------------------|---------------------------------------|
| $K_C$                                                      | constant excitation (Eq 1)                                                                                    | 0.01                                  |
| $K_{L+}$                                                   | length feedback gain (Eq 2)                                                                                   | 0.1                                   |
| $l_o$                                                      | length feedback offset (Eq 2)                                                                                 | 0.05                                  |
| $K_{V+}$                                                   | velocity feedback gain (Eq 3)                                                                                 | 0.05                                  |
| $K_{F\pm}$                                                 | force feedback gain (Eq 4)                                                                                    | 0.1                                   |
| $K_p$                                                      | pelvis tilt orientation feedback gain (Eq 5)                                                                  | 0.05                                  |
| $\theta_o$                                                 | pelvis tilt orientation offset (Eq 5)                                                                         | 0.01                                  |
| $K_v$                                                      | pelvis tilt velocity feedback gain (Eq 5)                                                                     | 0.05                                  |
| State transition: ES to MS                                 | horizontal distance between ipsilateral foot and pelvis                                                       | 0.01                                  |
| State transition: PS to S                                  | GRF on ipsilateral foot                                                                                       | 0.01                                  |
| State transition: S to LP                                  | horizontal distance between ipsilateral foot and pelvis                                                       | 0.01                                  |
| State transition: LP to ES                                 | GRF on ipsilateral foot                                                                                       | 0.01                                  |
| Initial positions                                          | Initial pelvis tilt, hip, knee, and ankle angles                                                              | 0.01                                  |
| Initial velocities (except for pelvis horizontal velocity) | Initial pelvis tilt, hip, knee, and ankle angular velocities. Initial pelvis vertical translational velocity. | 0.01                                  |
| Initial pelvis horizontal velocity (targeted speed)**      | Initial pelvis horizontal velocity during a simulation with a targeted speed.                                 | 0.01                                  |
| Initial pelvis horizontal velocity (self-selected speed)** | Initial pelvis horizontal velocity during a self-selected speed simulation.                                   | 0.1                                   |

\* Equation numbers in this column refer to those in the main text.

\*\* Since these two affect the same parameter, only one of these is used depending on the type of simulation (i.e., targeted speed or self-selected speed).
