# Supplementary material for: Predicting gait adaptations due to ankle plantarflexor muscle weakness and contracture using physics-based musculoskeletal simulations
Source: PubMed Central journal article supplement (PMC6797212; doi:10.1371/journal.pcbi.1006993), 2019-10-07
Supplement: pcbi.1006993.s007.pdf [file pcbi.1006993.s007.pdf]

**S3 Table. Muscle activity comparisons between simulations and *Perry and Burnfield, 2010* for Fig 7.**

| <b>Simulated muscle</b>          | <b>Muscles from <i>Perry and Burnfield, 2010</i></b>                                        |
|----------------------------------|---------------------------------------------------------------------------------------------|
| gluteus maximus (GMAX)           | Gluteus Maximus, Upper<br>Gluteus Maximus, Upper                                            |
| biarticular hamstrings (HAMS)    | Biceps Femoris, Long Head<br>Semimembranosus<br>Semitendinosus*                             |
| iliopsoas (ILPSO)                | Iliacus                                                                                     |
| rectus femoris (RF)              | Rectus Femoris                                                                              |
| vasti (VAS)                      | Vastus Intermedius<br>Vastus Lateralis<br>Vastus Medialis Longus<br>Vastus Medialis Oblique |
| biceps femoris short head (BFSH) | Biceps Femoris, Short Head*                                                                 |
| gastrocnemius (GAS)              | Gastrocnemius                                                                               |
| soleus (SOL)                     | Soleus                                                                                      |
| tibialis anterior (TA)           | Tibialis Anterior                                                                           |

\* In *Perry and Burnfield, 2010*, “Semitendinosus” and “Biceps Femoris, Short Head” also have gray areas during late stance indicating that the activity was not seen in a majority of subjects. These are not included in Fig 7.
