# Supplementary material for: Predicting gait adaptations due to ankle plantarflexor muscle weakness and contracture using physics-based musculoskeletal simulations
Source: PLoS Comput Biol. 2019 Oct 7;15(10):e1006993. doi: 10.1371/journal.pcbi.1006993 (PMC6797212; doi:10.1371/journal.pcbi.1006993)
Supplement: S4 Fig — (PDF) [file pcbi.1006993.s004.pdf]

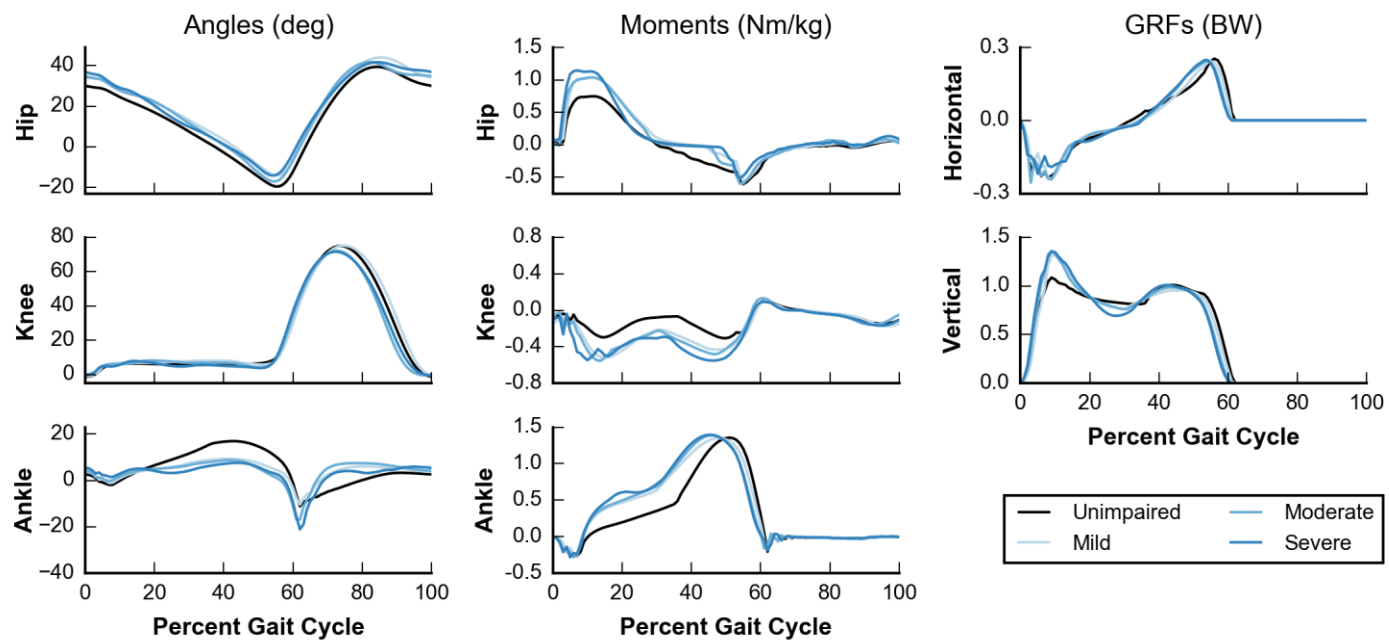

**S4A Fig. Simulated walking with mild, moderate, and severe soleus (SOL) weakness.**

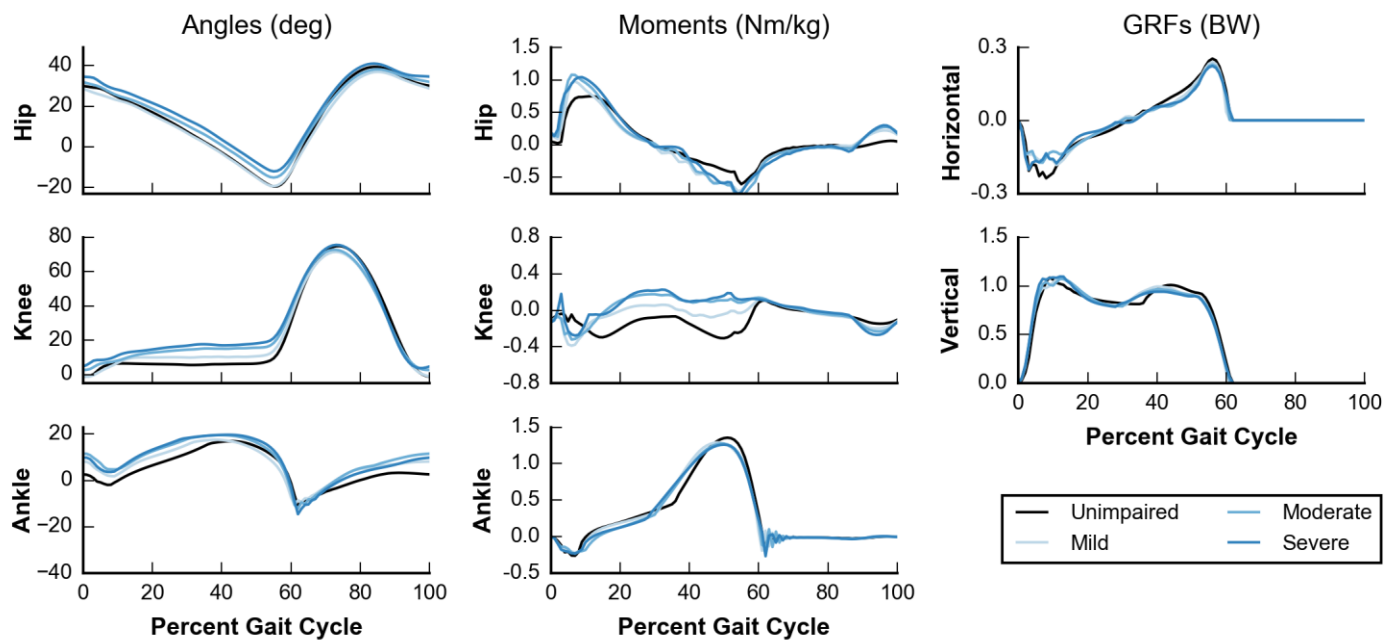

**S4B Fig. Simulated walking with mild, moderate, and severe gastrocnemius (GAS) weakness.**

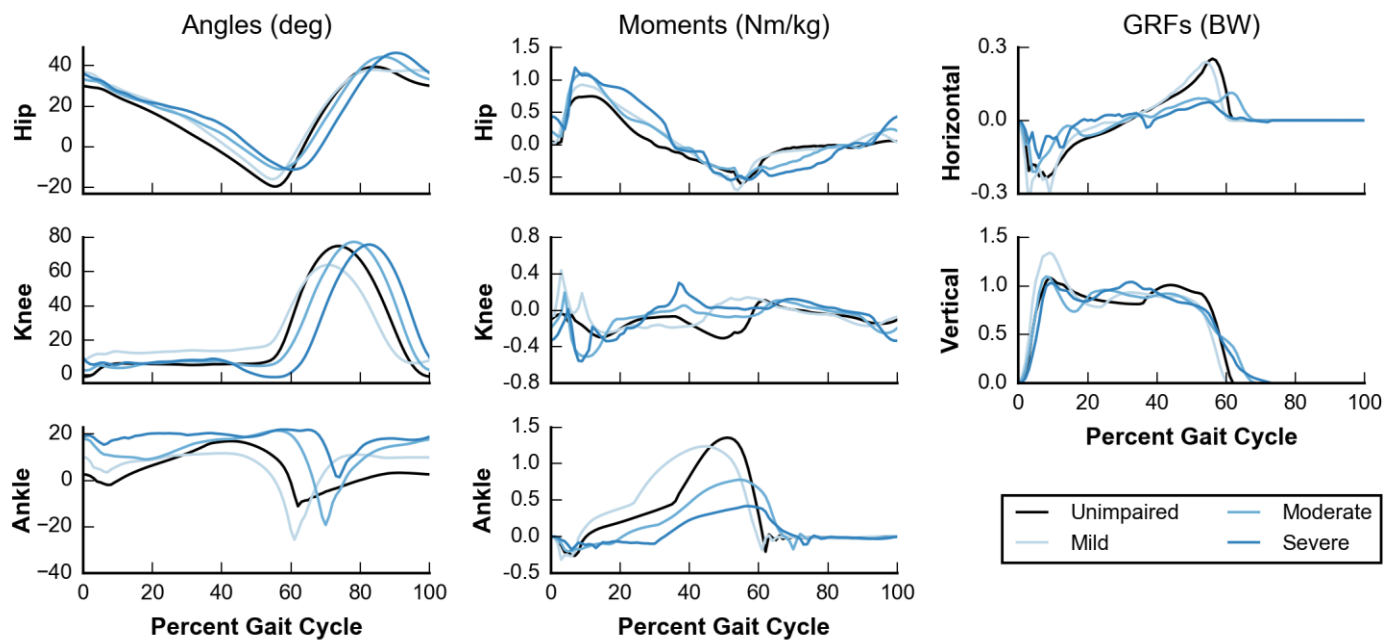

**S4C Fig. Simulated walking with mild, moderate, and severe soleus and gastrocnemius (PF) weakness.**

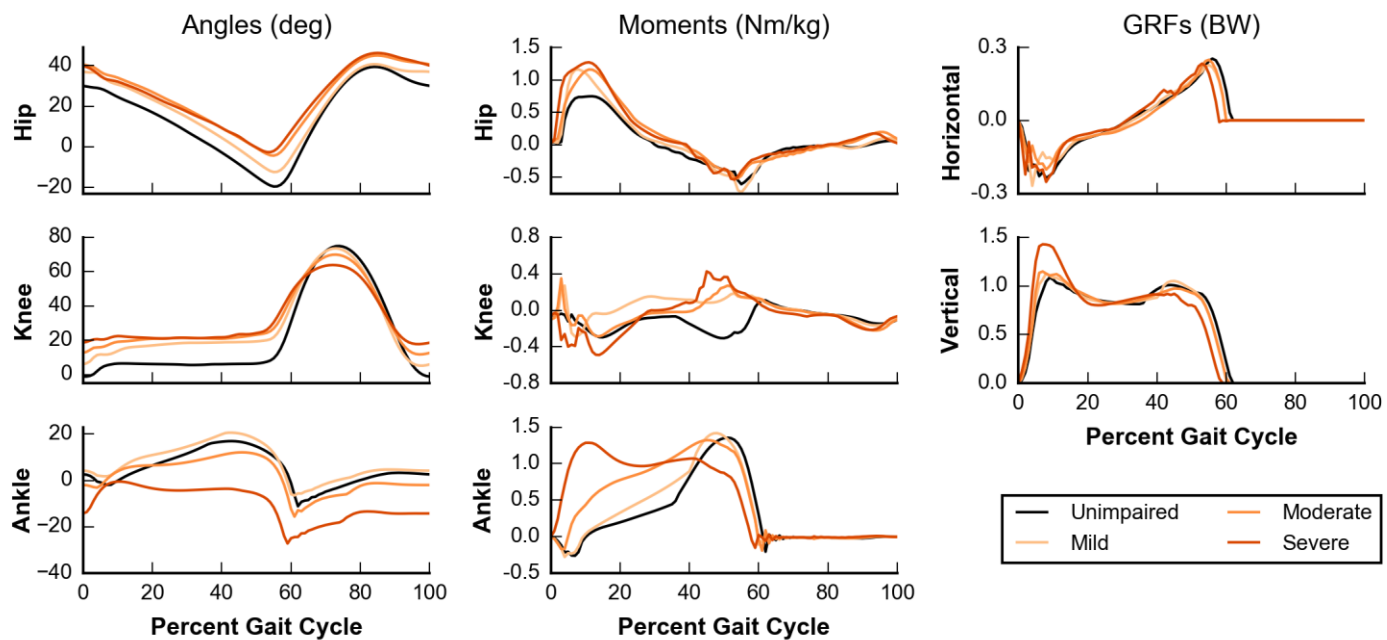

**S4D Fig. Simulated walking with mild, moderate, and severe soleus (SOL) contracture.**

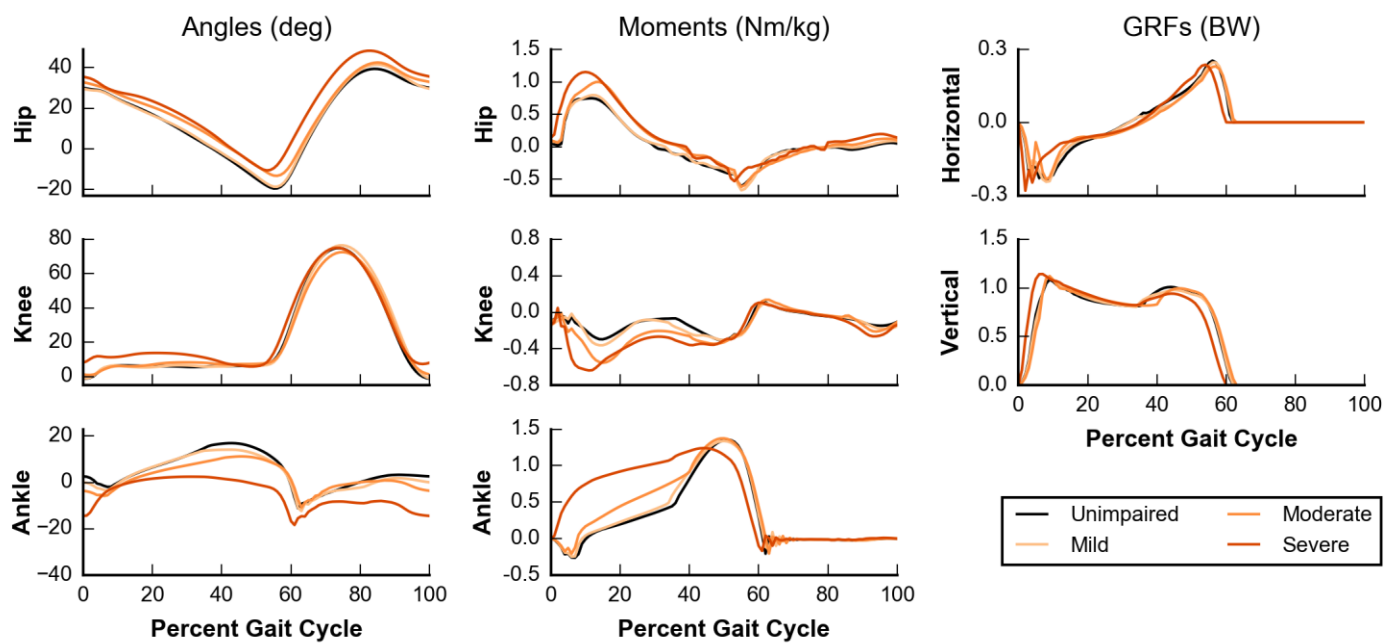

**S4E Fig. Simulated walking with mild, moderate, and severe gastrocnemius (GAS) contracture.**

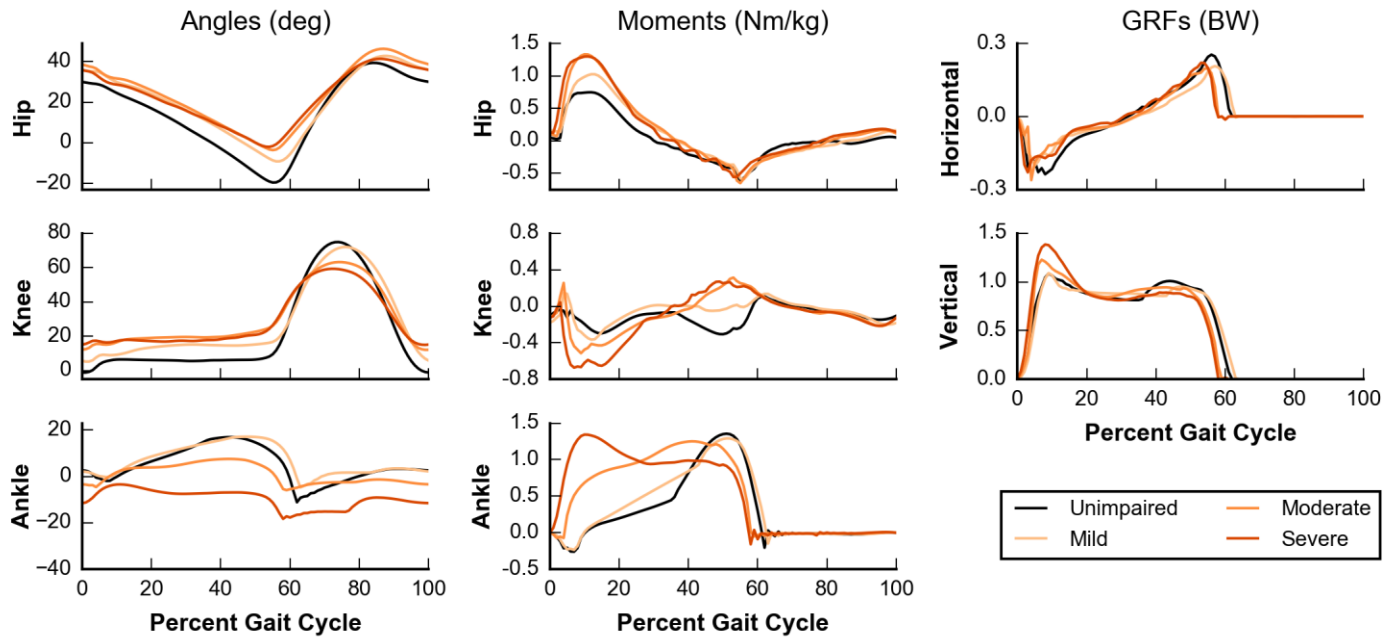

**S4F Fig. Simulated walking with mild, moderate, and severe soleus and gastrocnemius (PF) contracture.**
